# Supplementary material for: Rhinovirus Genotypes Circulating in Bulgaria, 2018–2021
Source: MDPI journal article supplement (doi:10.3390/v15071608), 2023-07-22
Supplement: s1 [file s1]

Supplementary Table S1. Rhinovirus genotypes

| Isolate designation | Diagnosis              | RV Type | Segment | Genotype | Div* <7% | Segment         | Genotype | Div* <10% |
|---------------------|------------------------|---------|---------|----------|----------|-----------------|----------|-----------|
| 01BG2018            | ARI                    | RV A    | 5'UTR   | A47      | 1.67%    | partial         | A47      | 1.15%     |
| 02BG2018            | ILI                    | RV A    | 5'UTR   | A21      | 1.26%    | -               | -        | -         |
| 03BG2018            | ARI                    | RV B    | 5'UTR   | B4       | 1.69%    | -               | -        | -         |
| 04BG2018            | ILI                    | RV A    | 5'UTR   | A16      | 2.49%    | -               | -        | -         |
| 05BG2018            | ILI                    | RV A    | 5'UTR   | A57      | 2.08%    | -               | -        | -         |
| 06BG2018            | Other                  | RV A    | 5'UTR   | A94      | 2.89%    | VP4/VP2 partial | A94      | 0.76%     |
| 11BG2018            | ARI/LRTI/Bronchiolitis | RV A    | 5'UTR   | A68      | 2.05%    | VP4/VP2 partial | A68      | 4.55%     |
| 12BG2018            | ARI/LRTI/Bronchiolitis | RV C    | 5'UTR   | C4       | 1.65%    | -               | -        | -         |
| 13BG2019            | ARI                    | RV C    | 5'UTR   | C42      | 5%       | VP4/VP2 partial | C42      | 6.92%     |
| 14BG2019            | ARI/LRTI/Bronchiolitis | RV A    | 5'UTR   | A102     | 0.82%    | VP4/VP2 partial | A102     | 3.68%     |
| 15BG2019            | ARI/LRTI/Bronchiolitis | RV A    | 5'UTR   | A43      | 4.53%    | -               | -        | -         |
| 16BG2019            | ARI/LRTI/Bronchiolitis | RV C    | 5'UTR   | C3       | 1.94%    | VP4/VP2 partial | C3       | 3.43%     |
| 17BG2019            | ILI                    | RV A    | 5'UTR   | A71      | 8%↑      | VP4/VP2 partial | A71      | 8.53%     |
| 18BG2019            | Other                  | RV A    | 5'UTR   | A105     | 2.48%    | VP4/VP2 partial | A105     | 2.81%     |
| 21BG2019            | ARI/LRTI/Bronchiolitis | RV C    | 5'UTR   | C6       | 2.86%    | -               | -        | -         |
| 22BG2019            | ARI/LRTI/Bronchiolitis | RV A    | 5'UTR   | A101     | 4.92%    | VP4/VP2 partial | A101     | 8.97%     |
| 23BG2019            | ARI/LRTI/Bronchiolitis | RV C    | 5'UTR   | C12      | 5.74%    | VP4/VP2 partial | C12      | 4.35%     |
| 24BG2019            | ARI/LRTI/Bronchiolitis | RV A    | 5'UTR   | A49      | 5.86%    | VP4/VP2 partial | A21      | 1.77%     |
| 26BG2019            | ARI/URI/Laringitis     | RV B    | 5'UTR   | B6       | 1.69%    | VP4/VP2 partial | B6       | 0.69%     |
| 27BG2019            | ARD                    | RV B    | 5'UTR   | B3       | 2.44%    | VP4/VP2 partial | B3       | 1.37%     |
| 30BG2019            | ARI/LRTI/Croup         | RV C    | 5'UTR   | C32      | 8.92%↑   | VP4/VP2 partial | C32      | 7.72%     |
| 31BG2019            | ARI/LRTI/Bronchiolitis | RV C    | 5'UTR   | C8       | 3.66%    | VP4/VP2 partial | C8       | 6.55%     |
| 32BG2019            | ARI/LRTI/Bronchiolitis | RV A    | 5'UTR   | A78      | 3.27%    | VP4/VP2 partial | A78      | 3.57%     |
| 35BG2019            | Other                  | RV A    | 5'UTR   | A105     | 2.44%    | VP4/VP2 partial | A105     | 3%        |
| 36BG2019            | ARI/LRTI/Bronchiolitis | RV C    | -       | -        |          | VP4/VP2 partial | C31      | 0.7%      |
| 38BG2019            | ARI/LRTI/Croup         | RV C    | 5'UTR   | C3       | 1.93%    | VP4/VP2 partial | C3       | 2.89%     |
| 39BG2019            | ARI                    | RV A    | 5'UTR   | A49      | 2.09%    | VP4/VP2 partial | A49      | 1.43%     |

|          |                             |      |       |     |       |                    |     |       |
|----------|-----------------------------|------|-------|-----|-------|--------------------|-----|-------|
| 44BG2021 | ILI/ARI-possible<br>COVID19 | RV B | 5'UTR | B6  | 3.81% | VP4/VP2<br>partial | B6  | 4.55% |
| 45BG2021 | ILI/ARI-possible<br>COVID19 | RV B | 5'UTR | B91 | 4.17% | VP4/VP2<br>partial | B91 | 2.08% |
| 46BG2021 | ILI/ARI-possible<br>COVID19 | RV C | 5'UTR | C1  | 5.53% | -                  | -   | -     |
| 47BG2021 | ILI/ARI-possible<br>COVID19 | RV C | 5'UTR | C3  | 1.96% | VP4/VP2<br>partial | C3  | 4.43% |
| 48BG2021 | ILI/ARI-possible<br>COVID19 | RV C | 5'UTR | C24 | 1.65% | VP4/VP2<br>partial | C24 | 2.91% |
| 49BG2021 | ILI/ARI-possible<br>COVID19 | RV C | 5'UTR | C24 | 1.99% | VP4/VP2<br>partial | C24 | 1.86% |
| 50BG2021 | ILI/ARI-possible<br>COVID19 | RV A | 5'UTR | A12 | 2.94% | VP4/VP2<br>partial | A12 | 2.85% |
| 51BG2021 | ILI/ARI-possible<br>COVID19 | RV C | 5'UTR | C11 | 6.53% | -                  | -   | -     |
| 52BG2021 | ILI/ARI-possible<br>COVID19 | RV C | 5'UTR | C23 | 5.39% | VP4/VP2<br>partial | C23 | 4.68% |
| 53BG2021 | ILI/ARI-possible<br>COVID19 | RV C | 5'UTR | C7  | 4.49% | VP4/VP2<br>partial | C21 | 0.98% |
| 54BG2021 | ILI/ARI-possible<br>COVID19 | RV C | 5'UTR | C22 | 1.99% | VP4/VP2<br>partial | C22 | 2.88% |
| 55BG2021 | ILI/ARI-possible<br>COVID19 | RV C | 5'UTR | C40 | 3.7%  | -                  | -   | -     |
| 56BG2021 | ILI/ARI-possible<br>COVID19 | RV C | 5'UTR | C7  | 5.41% | VP4/VP2<br>partial | C21 | 0.98% |
| 57BG2021 | ILI/ARI-possible<br>COVID19 | RV A | 5'UTR | A31 | 1.25% | VP4/VP2<br>partial | A31 | 0.71% |
| 58BG2021 | ILI/ARI-possible<br>COVID19 | RV C | 5'UTR | C23 | 1.68% | VP4/VP2<br>partial | C23 | 3.6%  |
| 59BG2021 | ILI/ARI-possible<br>COVID19 | RV A | 5'UTR | A80 | 2.9%  | VP4/VP2<br>partial | A80 | 7.72% |
| 60BG2021 | ILI/ARI-possible<br>COVID19 | RV C | 5'UTR | C1  | 2.35% | VP4/VP2<br>partial | C1  | 0.36% |
| 61BG2021 | ILI/ARI-possible<br>COVID19 | RV C | 5'UTR | C   | -     | VP4/VP2<br>partial | C25 | 6.99% |
| 62BG2021 | ILI/ARI-possible<br>COVID19 | RV A | 5'UTR | A80 | 2.5%  | VP4/VP2<br>partial | A80 | 7.02% |
| 63BG2021 | ILI/ARI-possible<br>COVID19 | RV C | 5'UTR | C5  | 2.07% | VP4/VP2<br>partial | C5  | 6.09% |
| 64BG2021 | ARI                         | RV C | 5'UTR | C20 | 6.25% | VP4/VP2<br>partial | C29 | 2.44% |

\* Divergence from the closest referent strain with complete genome, based on BLAST score result; Isolates for which 5'UTR region alone is insufficient for genotyping are marked in yellow; Isolates for which comparison of phylogenetic grouping based on the 5'UTR and VP4/VP2 regions showed a different grouping are marked in orange.
